# Supplementary material
Source: HighWire-hosted journal article supplement (https://bmjopen.bmj.com/content/10/10/e038893)
Supplement: inline-supplementary-material-1 [file inline-supplementary-material-1.pdf]

## Example of search strategy in OVID MEDLINE , Embase, Psych INFO databases

| Searches | Key words                                                                                           |
|----------|-----------------------------------------------------------------------------------------------------|
| 1        | Internship program.mp                                                                               |
| 2        | Nurse residency program.mp.                                                                         |
| 3        | Transition program*.mp.                                                                             |
| 4        | 1 or 2 or 3                                                                                         |
| 5        | exp Students, Nursing/                                                                              |
| 6        | New graduate nurses.mp.                                                                             |
| 7        | Graduate nurs*.mp.                                                                                  |
| 8        | 5 or 6 or 7                                                                                         |
| 9        | exp Workplace Violence/ or exp Violence/ or exp Nursing Staff, Hospital/ or workplace violence*.mp. |
| 10       | Workplace bullying.mp. or exp Bullying/                                                             |
| 11       | Hostility.mp. or exp Hostility/                                                                     |
| 12       | Incivility.mp. or exp Incivility/ or exp Nursing Staff, Hospital/ or exp Workplace/                 |
| 13       | Conflicts.mp.                                                                                       |
| 14       | Microaggression.mp.                                                                                 |
| 15       | exp "Resilience (Psychological)"/ or exp Coping Behaviour/ or resilience.mp                         |
| 16       | 9 or 10 or 11 or 12 or 13 or 14 or 15                                                               |
| 17       | 4 and 8 and 16                                                                                      |
